# Supplementary material for: A Workflow to Investigate Exposure and Pharmacokinetic Influences on High-Throughput in Vitro Chemical Screening Based on Adverse Outcome Pathways
Source: PubMed Central journal article supplement (PMC4710605; doi:10.1289/ehp.1409450), 2015-05-15
Supplement: ehp.1409450.s001.acco.pdf [file ehp.1409450.s001.acco.pdf]

**Note to Readers:** *EHP* strives to ensure that all journal content is accessible to all readers. However, some figures and Supplemental Material published in *EHP* articles may not conform to 508 standards due to the complexity of the information being presented. If you need assistance accessing journal content, please contact [ehp508@niehs.nih.gov](mailto:ehp508@niehs.nih.gov). Our staff will work with you to assess and meet your accessibility needs within 3 working days.

## **Supplemental Material**

# **A Workflow to Investigate Exposure and Pharmacokinetic Influences on High-Throughput *in Vitro* Chemical Screening Based on Adverse Outcome Pathways**

Martin B. Phillips, Jeremy A. Leonard, Christopher M. Grulke, Daniel T. Chang, Stephen W. Edwards, Raina Brooks, Michael-Rock Goldsmith, Hisham El-Masri, and Yu-Mei Tan

### **Table of Contents**

Methods for ToxCast™ protocol

Chemical quality control

Chemical assays

References

**Table S1.** Structural similarities between “high priority” active chemicals and twenty-two remaining nearest neighbor inactive chemicals as determined through the presence or absence of structural Molecular Access System (MACCS) keys.

## Methods for ToxCast™ protocol

### *Chemical quality control*

Chemical information associated with the ToxCast library (MSDS, CAS registry numbers, molecular weight, handling procedures, etc.) were quality reviewed before being entered into the ChemInventory database and structure-annotated into US EPA's DSSTox Project <http://www.epa.gov/ncct/dsstox/>. DSSTox chemical identifiers (GSID, chemical name, CAS registry number, etc.) were then entered into the ChemInventory Bottle and Sample ID table to establish linkage between the ChemInventory and DSSTox Master databases. See <http://www.epa.gov/ncct/dsstox/ChemicalInfQAProcedures.html> for detailed information regarding chemical information quality review.

Chemicals procured through suppliers were also subject to analytical procedures to check purity, identity, and concentration. Chemicals were diluted in dimethyl sulfoxide (DMSO) to a final concentration of 3 mM in 20 µL and analyzed by OpAns Analytical Laboratory on an LC/MS (liquid chromatography mass spectrometry) platform. Those failing identity (molecular weight) checks with purity less than 50% were subject to additional LC/MS testing, as well as GC/MS (gas chromatography mass spectrometry) analysis at the National Institutes of Standards and Technology. Additional information regarding analytical QC of procured chemicals can be found at <http://www.epa.gov/ncct/toxcast/chemicals.html>.

### *Chemical assays*

The Novascreen acetylcholinesterase (AChE) analysis, developed and run by Caliper, a PerkinElmer company, consisted of an *in vitro* cell-free biochemical assay that detected the inhibition of human-derived AChE enzyme as determined colorimetrically by enzyme reporter activity using the substrate acetylcholine and a positive control of physostigmine (eserine).

ToxCast™ Phase I and Phase II chemicals were diluted using 20 mM DMSO and added to 96-well plates at a single concentration of 10 or 25  $\mu\text{M}$ . If a chemical exhibited a significant response (enzyme inhibition), then a concentration-response approach was used.

Raw data (percent activity versus positive control) from each chemical analysis was received by EPA and processed within the custom workflow for all assays in the ToxCast™ project (Judson et al. 2012). Phase I and Phase II data were subjected to curve-fitting algorithms for computing and processing to determine potency ( $AC_{50}$  or concentration that elicited 50% activity) and efficacy ( $E_{\text{max}}$  or maximum response). A four-parameter Hill function was fit to the concentration-response curves using the *nls* package of the open source language “R” (R Development Core Team 2008) and included the following assumptions: concentration-responses were monotonic, outliers were removed when there was a monotonic curve, a variable slope was allowed, and negative inhibition (activation) was allowed for the enzymatic assay. Curve asymptotes were constrained to -10 and 10% (lower) and 100 and 110% (upper) to maintain consistent extrapolation of  $AC_{50}$  for each assay-compound combination, and extrapolations were allowed at a 3-fold lower concentration than the lowest tested concentration and a 3-fold higher concentration than the highest test concentration so that potential activity could be captured outside the normal test range. Additional criteria for determining  $AC_{50}$  included the  $R^2$  coefficient of determination for Hill curves at  $\geq 0.6$ ,  $p$  values  $\leq 0.01$ , and  $E_{\text{max}}$  values  $\geq 30\%$  baseline activity.  $AC_{50}$  values were transformed as  $-\log(AC_{50}/1000000)$  to reflect potency. A compound that was considered to be inactive in an assay was set to 1,000,000  $\mu\text{M}$  (i.e., 1M) before transformation to ensure a potency of 0.

## References

Judson RS, Martin MT, Egeghy P, Gangwal S, Reif DM, Kothiya P, et al. 2012. Aggregating data for computational toxicology applications: The U.S. Environmental Protection Agency (EPA) Aggregated Computational Toxicology Resource (ACToR) System. *Int J Mol Sci* 13:1805-1831.

R Core Team. 2013. R: A language and environment for statistical computing. R Foundation for Statistical Computing, Vienna, Austria. Available: <http://www.R-project.org/> [accessed 30 April 2015].

**Table S1.** Structural similarities between “high priority” active chemicals and twenty-two remaining nearest neighbor inactive chemicals as determined through the presence or absence of structural MACCS<sup>a</sup> keys.

| <u>Inactive Chemical</u>                  | <u>Active Chemical</u>           | <u>Similarity Score</u> |
|-------------------------------------------|----------------------------------|-------------------------|
| Sodium dodecylbenzenesulfonate            | 4-Dodecylbenzenesulfonic acid    | 100                     |
| Dodecylbenzene sulfonate triethanolamine  | 4-Dodecylbenzenesulfonic acid    | 100                     |
| Dodecyltrimethylammonium chloride         | Didecyldimethylammonium chloride | 96                      |
| Chlorpyrifos                              | Chlorpyrifos oxon                | 91                      |
| SR144190A                                 | SSR241586                        | 90                      |
| 2-(Hydroxymethyl)-2-nitro-1,3-propanediol | Bronopol                         | 89                      |
| Aldicarb                                  | Methomyl                         | 88                      |
| SAR102779                                 | SSR241586                        | 88                      |
| Trichlorfon                               | Naled                            | 86                      |
| Dichlorvos                                | Naled                            | 83                      |
| Phosalone                                 | Azamethiphos                     | 81                      |
| SSR146977                                 | SSR241586                        | 81                      |
| UK-343664                                 | SSR69091                         | 79                      |
| 2,2',4,4'-Tetrahydroxybenzophenone        | Anthralin                        | 78                      |
| Chlorpyrifos-methyl                       | Chlorpyrifos oxon                | 76                      |
| PharmaGSID_47258                          | SSR241586                        | 76                      |
| SSR240612                                 | SSR69071                         | 76                      |
| <i>N,N</i> -Dimethyloctylamine            | Didecyldimethylammonium chloride | 75                      |
| <i>N</i> -Methyldioctylamine              | Didecyldimethylammonium chloride | 75                      |
| Volinaserin                               | SR125047                         | 75                      |
| AVE3247                                   | PharmaGSID_48172                 | 75                      |
| SAR377142                                 | SSR241586                        | 75                      |

<sup>a</sup>Molecular Access System
